# Supplementary material for: SmartAirQ: A Big Data Governance Framework for Urban Air Quality Management in Smart Cities
Source: Frontiers journal article supplement (doi:10.3389/fenvs.2022.785129), 2022-04-08
Supplement: Data_Sheet_1.pdf [file Data_Sheet_1.pdf]

## Supplementary material

**Table 1: City Characteristics**

| Data Type             | Data                                                      | Periodicity | Formats  | UAQM component                                         | Source                                                                          |
|-----------------------|-----------------------------------------------------------|-------------|----------|--------------------------------------------------------|---------------------------------------------------------------------------------|
| <b>Demographic</b>    | Population<br>Vulnerable population<br>School population  | 10 years    | XML      | Policy goal setting<br>Exposure study                  | Census<br>Smart City Platform                                                   |
| <b>Demographic</b>    | Ward wise population density                              | 10 years    | XML      | Policy goal setting<br>Exposure study                  | Census<br>Smart City platform                                                   |
| <b>Economy</b>        | Projected economic growth                                 | periodic    | XML      | Policy goal setting<br>Control measures                | Municipality City<br>Master plan                                                |
| <b>Infrastructure</b> | route length, type and location                           |             | XML      | EI<br>DSS                                              | Infrastructure<br>Department / Satellite                                        |
| <b>Infrastructure</b> | Buildings                                                 |             | XML      | EI<br>DSS                                              | Infrastructure<br>Department / Satellite                                        |
|                       | Bicycle path length and location                          |             |          | EI<br>Exposure study<br>DSS                            |                                                                                 |
|                       | Metro route length and location                           |             |          | EI<br>DSS                                              |                                                                                 |
| <b>Mobility</b>       | Public transport route, length, frequency and location    |             | XML/CSV  | EI<br>DSS<br>Urban planning                            | Transport Department                                                            |
| <b>Mobility</b>       | Parking lot location                                      |             | XML      | Modeling<br>DSS                                        | Transport<br>Department                                                         |
| <b>Infrastructure</b> | Business areas, Residential areas, Industry areas         |             | XML/CSV  | EI<br>Monitoring<br>Modeling<br>DSS                    | Infrastructure<br>Department                                                    |
| <b>Infrastructure</b> | Footpath length and location                              |             | XML/CSV  | EI<br>Monitoring<br>Modeling<br>DSS                    | Infrastructure<br>Department                                                    |
| <b>Infrastructure</b> | Place of interest (hospitals, schools, restaurants, etc)  |             | CSV/JSON | EI<br>Monitoring, exposure assessment<br>DSS           | Infrastructure<br>department                                                    |
| <b>Mobility</b>       | Electric vehicle charging location                        |             | XML/CSV  | Modeling<br>DSS                                        | Infrastructure<br>Department                                                    |
| <b>LULC</b>           | Green areas, open area, trees, parks, water bodies, hills | Yearly      | NetCdf   | Policy and goal setting, Modeling, exposure assessment | Satellite (Scientists)<br>LANDSAT(Kantakumar et al., 2016)<br>Garden Department |
| <b>GIS**</b>          | Area and point shape files                                |             | shp      | All UAQM components                                    | Municipalities                                                                  |
| <b>GIS</b>            | maps                                                      |             | OSM/XML  | All UAQM components                                    | Openstreetmap                                                                   |

|                               |                                                                                            |                 |              |                                                |                                           |
|-------------------------------|--------------------------------------------------------------------------------------------|-----------------|--------------|------------------------------------------------|-------------------------------------------|
| <b>Climate</b>                | Local climatic zones                                                                       |                 | NetCDF       | Modeling                                       | Satellite, WUDAPT<br>(Ching et al., 2018) |
| <b>Emissions</b>              | Emission Factors                                                                           |                 | Excel        | EI                                             | CPCB                                      |
| <b>Fuel</b>                   | Fuel types and distribution                                                                | Yearly Periodic | / Excel      | EI<br>Control Measures                         | GOI Petroleum ministry                    |
| <b>Infrastructure</b>         | GIS Maps                                                                                   | Periodic        | JSON         | EI,<br>Modeling,<br>Monitoring, DSS,<br>APP    | IT department /<br>Openstreetmap          |
| <b>Gap Assessment records</b> | Monitoring, local and non-local source listing, solid waste management, pollution exposure | Periodic        | Excel / Text | Goal setting,<br>Modeling,<br>Control Measures | Environment Department                    |

**Table 2: Monitoring and Observations#**

| Data type                                 | Data                                                      | Periodicity        | format                           | UAQM Component                     | source                                            |
|-------------------------------------------|-----------------------------------------------------------|--------------------|----------------------------------|------------------------------------|---------------------------------------------------|
| <b>Air Quality (in-situ) observations</b> | PM10, PM2.5, CO2, NOx, SO2, O3, NH3, Benzene, Toulene, BC | Hourly / 15 min    | XML/CSV/ Excel, Manual Hard copy | Monitoring, Modeling, DSS          | CPCB<br>MPCB<br>SAFAR<br>Local Municipality       |
| <b>Air Quality (LCS) observations</b>     | PM10, PM2.5, CO2, NOx, SO2, O3                            | Hourly / 15 min    | SensorML, NetCDF/CF,             | Monitoring, Modeling, DSS          | Smart City service (IUDX)                         |
| <b>Air Quality observations</b>           | AQI                                                       | Daily              | XML/CSV                          | DSS                                | Environment Department                            |
| <b>Air Quality Calibration</b>            | In-situ and LCS Maintenance                               | Periodic / Season  | XML / CSV                        | Monitoring, Modeling, DSS          | CPCB<br>Smart City Service provider               |
| <b>Weather observations</b>               | Temperature, Humidity, wind speed & direction, pressure,  | Hourly / 15 min    | XML/CSV                          | Monitoring, Modeling, DSS          | IMD                                               |
| <b>Satellite</b>                          | NO2, O3, SO2, CO, AOD (PM10)(PM2.5)                       | 15min              | NetCDF                           | Monitoring<br>Modeling             | NASA Merra / Aqua,Sentinel-5P, INSAT <sup>1</sup> |
| <b>Satellite</b>                          | AOD derived fire count                                    | 15min              | NetCDF                           | Monitoring, Modeling               | FINN                                              |
| <b>Remote sensing – ground Radar</b>      | Weather parameters                                        | 15min              | NetCDF                           | Monitoring<br>Modeling             | IMD                                               |
| <b>Social Media</b>                       | Traffic update                                            | Real time          | text                             | Modeling                           | Twitter<br>Crowd sourcing (IT department)         |
| <b>Social Media</b>                       | Pollution status                                          | Real time          | text                             | Modeling, DSS                      | Twitter<br>Crowd sourcing (IT department)         |
| <b>Social Media</b>                       | Perception                                                | Real time          | text                             | Modeling, Health impact assessment | Twitter<br>Crowd sourcing (IT department)         |
| <b>Mobile phones</b>                      | Activity data, Photos                                     | Real time          | CSV / MP3 / MP4 /WAV             | Modeling, DSS, APP services        | Service Providers                                 |
| <b>Industry</b>                           | Emission data from polluting industry                     | Real time (15 min) | XML/CSV                          | EI, Modeling, Control measures     | CPCB/SPCB                                         |
| <b>Construction</b>                       | dust emissions,                                           | Real time          | XML/CSV,                         | EI, Modeling,                      | Infrastructure                                    |

<sup>1</sup> <https://worldview.earthdata.nasa.gov/>  
<https://www.avl.class.noaa.gov/saa/products/catSearch>

|                                      |                                                                                                              |                               |                       |                                                                     |                                                                                      |
|--------------------------------------|--------------------------------------------------------------------------------------------------------------|-------------------------------|-----------------------|---------------------------------------------------------------------|--------------------------------------------------------------------------------------|
|                                      | Photos                                                                                                       |                               | JPG,<br>MP3/MP4       | Control Measures                                                    |                                                                                      |
| <b>Transport</b>                     | Road density                                                                                                 | Real time                     | XML/CSV               | EI, AI-Modeling<br>DSS, Control<br>measures                         | Smart City transport<br>service                                                      |
| <b>Transport</b>                     | Traffic count /<br>Congestion                                                                                | Real time                     | CCTV image<br>formats | EI, AI-Modeling,<br>DSS, Control<br>Measures                        | Smart city transport<br>service                                                      |
| <b>Transport</b>                     | Vehicle count<br>at Traffic<br>junctions                                                                     | Real time                     | CCTV image<br>formats | EI, AI-Modeling,<br>DSS, Control<br>Measures                        | Smart city transport<br>service                                                      |
| <b>Transport</b>                     | Toll data /<br>emission zone<br>tax data<br>CCTV images                                                      | Real time                     | XML/CSV               | EI, Control<br>measures                                             | Transport department                                                                 |
| <b>Energy</b>                        | Demand-supply                                                                                                | Real time                     | XML/CSV               | EI, Modeling, DSS,<br>Control Measures                              | Smart city energy<br>service                                                         |
| <b>Health</b>                        | Hospital<br>records                                                                                          | Daily /<br>Extreme event      | XML/CSV               | Health exposure<br>assessment, AI-<br>modeling, Control<br>measures | Health Department                                                                    |
| <b>Citizen</b>                       | Feedback                                                                                                     | Real time /<br>intermittent   | Text                  | Health exposure,<br>Control measures                                | Environment<br>department, IT<br>department (social<br>media , facebook<br>extracts) |
| <b>Citizen</b>                       | Open burning<br>images                                                                                       | Real time /<br>intermittent   | JPG/MP3/MP4           | Control measures                                                    | Environment<br>department                                                            |
| <b>Observations<br/>(Mobile LCS)</b> | Emission sources                                                                                             | Mapped to<br>control measures | XML/CSV               | Control<br>measures, Health<br>assessment                           | Scientists,<br>Environment<br>Department                                             |
| <b>Emissions</b>                     | Emission source<br>data                                                                                      | Periodic                      | Excel/XML/CSV         | EI,<br>Source<br>Apportionment                                      | Scientists / Local<br>Environment<br>Department                                      |
| <b>Calibration</b>                   | Installation<br>LCS and in-situ<br>stations<br>calibration data<br>in laboratory<br>setup and at<br>location | Weekly/<br>random             | XML/CSV               | Monitoring                                                          | Vendor,<br>Environment<br>Department                                                 |
| <b>Compliance</b>                    | AQI based<br>compliance<br>days                                                                              | Periodic                      | XML/CSV               | Monitoring<br>Control Measures                                      | Environment<br>Department                                                            |
| <b>Compliance</b>                    | Industry<br>(number of<br>industries<br>meeting<br>standards                                                 | Periodic                      | XML/CSV               | Control Measures                                                    | Environment<br>Department                                                            |
| <b>Compliance</b>                    | Industry<br>(number of<br>industries not<br>meeting<br>standards)                                            | Periodic                      | XML / CSV             | Control Measures                                                    | Environment<br>Department                                                            |

**Table 3: Modeling**

| Data type                                                | Data                                                                                                                                                                                                                 | Periodicity                                                   | format        | UAQM Component                                         | Source                                                 |
|----------------------------------------------------------|----------------------------------------------------------------------------------------------------------------------------------------------------------------------------------------------------------------------|---------------------------------------------------------------|---------------|--------------------------------------------------------|--------------------------------------------------------|
| <b>Weather forecast model (Global / Regional /Urban)</b> | Wind speed & direction, temperature, UHI, humidity, precipitation, mixing layer height, turbulence, surface and boundary layer temperature, precipitation, humidity, cloud cover, reflectivity, boundary layer depth | Now casting / Short range (1-3 days)                          | NetCDF / JSON | Weather model, Dispersion models, Control measures     | Scientific organisations<br>IMD                        |
|                                                          | Automatic weather station, raingauge, fluxes, Radar                                                                                                                                                                  |                                                               |               |                                                        | IMD, ISRO                                              |
| <b>Air quality global/regional/urban/CFD</b>             | PM10, PM2.5, CO2, NOx, SO2, O3, NH3, Benzene, Toulene, BC,                                                                                                                                                           | Now casting / Short range (1-3 days) / Long range (3-10) days | NetCDF / JSON | Dispersion models<br>Health exposure assessment<br>DSS | Scientific organisations                               |
| <b>Air Quality</b>                                       | PM10/ PM2.5 characterisation<br>Ions, metals, carbon specific compositions, source profiles, seasonal source wise characteristics                                                                                    | Campaign                                                      | NetCDF / JSON | Source apportionment<br>DSS                            | Scientific organisation                                |
| <b>Air Quality Control Scenario projections</b>          | PM10, PM2.5, CO2, NOx, SO2, O3, NH3, Benzene, Toulene, BC,                                                                                                                                                           | Campaign / Now casting                                        | NetCDF / JSON | DSS                                                    | Scientific organisations<br>Local municipality<br>SPCB |
| <b>Health exposure assessment</b>                        | Mortality, Morbidity, DALYs (before and after control measures)<br>(short and long term exposure)<br>(projected disease burden in accordance to control measures)                                                    | Campaign                                                      | NetCDF/ JSON  | Policy Goal setting Modeling<br>DSS                    | Health experts<br>NGO                                  |
| <b>Emissions Inventory</b>                               | Control Measures                                                                                                                                                                                                     | Periodic                                                      | Excel/XML/CSV | Modeling, DSS                                          | CPCB, SPCB, Local environment department<br>Scientists |
| <b>Emissions</b>                                         | Source Profiles                                                                                                                                                                                                      | campaign                                                      | Excel         | Modeling                                               |                                                        |
| <b>Air Quality Modeling</b>                              | Control Measures*                                                                                                                                                                                                    | campaign                                                      | Excel/XML/CSV | Policy                                                 | CPCB, SPCB, Local environment department               |

|                           |                                                                                                                          |          |               |                       |                               |
|---------------------------|--------------------------------------------------------------------------------------------------------------------------|----------|---------------|-----------------------|-------------------------------|
| <b>Health</b>             | Cyclist exposure / outdoor activity                                                                                      | Periodic | Excel/XML/CSV | Health assessment     | Scientists, Health department |
| <b>Air quality</b>        | Extreme event / Specific studies<br>Model data                                                                           | campaign | XML/CSV       | Control Measures      | Scientists                    |
| <b>Physiographic data</b> | USGS ASTER DEM<br>CARTOSAT DEM<br>DEM<br>MODIS LULC<br>NRSC AWiFS<br>CARTOSAT LULC<br>NCEP/ERA-Interm Reanalysis product |          | NetCDF        | Weather and AQ models | Scientists                    |

**Table 4: City services**

| <b>Data type</b>   | <b>Data</b>                                                                                                                      | <b>Periodicity</b>                    | <b>format</b> | <b>UAQM Component</b> | <b>Source</b>                                                                             |
|--------------------|----------------------------------------------------------------------------------------------------------------------------------|---------------------------------------|---------------|-----------------------|-------------------------------------------------------------------------------------------|
| <b>Mobility</b>    | Multi-modal transport                                                                                                            | Mapped to control measures            | XML/CSV       | Control Measures*     | Smart city transport service                                                              |
| <b>Health</b>      | Pollutant wise Health exposure                                                                                                   | campaign                              | XML/CSV       | Health Exposure       | Epidemiological studies (Scientists)<br>Hospital admissions<br>Smart city Health services |
| <b>Health</b>      | Wearable device                                                                                                                  | Mapped to control measures / campaign | XML/CSV       | Control Measures, DSS | Smart city Health services                                                                |
| <b>Health</b>      | Vulnerable population exposure                                                                                                   | campaign                              | XML/CSV       | Control Measures, DSS | Smart city health services / NGO                                                          |
| <b>Emissions</b>   | Emission Factors                                                                                                                 |                                       | Excel         | EI                    | Scientists / Local Environment Department                                                 |
| <b>Governance</b>  | Emission zone surcharge collection                                                                                               | annual                                | Excel/XML/CSV | Control measures      | Revenue departments, traffic department, environment department                           |
| <b>Governance</b>  | Pollution Under Control data                                                                                                     | Monthly                               | Excel/XML/CSV | Control Measures      | Environment department                                                                    |
| <b>Calibration</b> | Reference Grade sensors, LCS, Wearable devices, Weather models, Air Quality models, AI models, Health exposure assessment models | campaign                              | Excel/XML/CSV | All components        | All stakeholders                                                                          |
| <b>Governance</b>  | Fuel Policy                                                                                                                      |                                       |               |                       |                                                                                           |

|                                   |                                                                                                                   |
|-----------------------------------|-------------------------------------------------------------------------------------------------------------------|
| <b>Governance</b>                 | Vehicle Emission standards                                                                                        |
|                                   | Industry Emission standards                                                                                       |
| <b>Governance</b>                 | Hospital records                                                                                                  |
| <b>Transport</b>                  | Mobility data                                                                                                     |
| <b>Control Measure assessment</b> | Implementation cost, Period for execution, benefits, DALY, Mortality rate, technical feasibility , responsibility |
|                                   | Socio-economic efficacy                                                                                           |
|                                   | Environmental status report                                                                                       |
|                                   | RTI query and reports                                                                                             |

**Table 5: EI data categories (few examples)**

| Category              | Data                                                                                                                                                         |
|-----------------------|--------------------------------------------------------------------------------------------------------------------------------------------------------------|
| <b>Transport</b>      | 2 wheelers, 3 wheelers, 4 wheelers, buses , taxies, taxi trajectories, bus / taxi trip data, Vehicles kilometre, travelled (VKT) as per the vehicle category |
| <b>Fuel</b>           | Fuel type and quantity                                                                                                                                       |
| <b>Infrastructure</b> | Road type, speed breakers, parking lots, road dust, construction, demolition, fly ash                                                                        |
| <b>Location</b>       | Market area, airport, station, bus stops, large hotels, open eateries, schools, hospitals, slums                                                             |
| <b>Industry</b>       | Type, type of fuel used, emission category                                                                                                                   |
| <b>Household</b>      | Type of residence, type of fuel used for cooking, energy source, diesel generators, domestic fuel consumption per household                                  |
| <b>Waste burning</b>  | Type of waste, stakeholder responsible for burning                                                                                                           |
| <b>Agriculture</b>    | Agriculture wind blown dust, agriculture pumps, agriculture land preparation, fertilizer                                                                     |
| <b>Brick kilns</b>    | Locations, type, quantity                                                                                                                                    |
| <b>Bakery</b>         | Number of bakeries, fuel type, consumption                                                                                                                   |
| <b>Restaurants</b>    | Types, size, open eateries                                                                                                                                   |
| <b>Ship Vessels</b>   | Total ship entering, total ship docking,                                                                                                                     |
| <b>crematorium</b>    | Type, fuel used                                                                                                                                              |
| <b>Power plant</b>    | Type, capacity                                                                                                                                               |

**Table 6: Technology stack (representative)**

| Components                      | Technologies                 |
|---------------------------------|------------------------------|
| <b>Webserver</b>                | Nginx                        |
| <b>Web Applications</b>         | Angular<br>Django<br>RestAPI |
| <b>Sentry Database</b>          | PostgreSQL, MongoDB          |
| <b>Title Server</b>             | GeoServer                    |
| <b>File Server (FTP Server)</b> | FileZilla                    |

|                                  |                                                                          |
|----------------------------------|--------------------------------------------------------------------------|
| <b>Internal Cloud</b>            | Kubernetes, Docker                                                       |
| <b>Internal local components</b> | Python, Java                                                             |
| <b>AI / ML</b>                   | Tensor Flow, Keras, PyTorch, Python                                      |
| <b>Accelerators Interface</b>    | CUDA                                                                     |
| <b>Bid Data Analytics</b>        | Hadoop eco system, MapReduce, SPARK, OpenAir (Carslaw and Ropkins, 2012) |
| <b>Map</b>                       | OpenStreetMap                                                            |
| <b>Visualization</b>             | NCL, VAPOR, VR software                                                  |
| <b>HPC</b>                       | MPI, OpenMP                                                              |

| <b>Development Tasks</b>  | <b>Technologies</b> |
|---------------------------|---------------------|
| <b>build / release</b>    | Jenkins             |
| <b>Testing</b>            | Selenium, Jira      |
| <b>Version Control</b>    | Visual SVN          |
| <b>Project Management</b> | Open Project        |

**Table 7 # Pollutant type and its consideration in UAQM functions**

| Pollutants                   | EI | Receptor | Dispersion | AQ Monitoring | Control Scenarios | Health exposure |
|------------------------------|----|----------|------------|---------------|-------------------|-----------------|
| Criteria Pollutants          |    |          |            |               |                   |                 |
| <b>PM10</b>                  | √  | √        | √          | √             | √                 | √               |
| <b>PM2.5</b>                 | √  | √        | √          | √             | √                 | √               |
| <b>NO2</b>                   | √  | NA       | √          | √             | √                 | √               |
| <b>SO2</b>                   | √  | NA       | √          | √             | √                 | √               |
| <b>Ozone</b>                 | √  | NA       | √          | √             | √                 | √               |
| <b>CO</b>                    | √  | NA       | √          | √             | √                 | √               |
| Other/GHG                    |    |          |            |               |                   |                 |
| <b>NH3</b>                   | √  |          |            | √             |                   |                 |
| <b>NH4</b>                   | √  |          |            | √             |                   |                 |
| <b>NO3</b>                   | √  |          |            | √             |                   |                 |
| <b>SO4</b>                   | √  |          |            | √             |                   |                 |
| VOCs                         |    |          |            |               |                   |                 |
| <b>Benzene</b>               | √  |          |            | √             |                   |                 |
| <b>Butadiene</b>             | √  |          |            | √             |                   |                 |
| <b>Butane</b>                | √  |          |            | √             |                   |                 |
| <b>Ethane</b>                | √  |          |            | √             |                   |                 |
| <b>Hexane</b>                | √  |          |            | √             |                   |                 |
| <b>Formaldehyde</b>          | √  |          |            | √             |                   |                 |
| <b>Total Aldehyde</b>        | √  |          |            | √             |                   |                 |
| Hydrocarbons                 |    |          |            |               |                   |                 |
| <b>CH4 - Methane</b>         | √  |          |            | √             |                   |                 |
| <b>Non-methane HC (NMHC)</b> |    |          |            | √             |                   |                 |
| <b>Total HC</b>              |    |          |            | √             |                   |                 |

**Table 8: Control Measures**

| <b>Type</b>                                             | <b>Control measures</b>                                                        |
|---------------------------------------------------------|--------------------------------------------------------------------------------|
| <b>Domestic, Bakeries, Restaurants fuel consumption</b> | Use of Natural Gas / LPG , Use of Electric cooking, solar cooking, LPG subsidy |
|                                                         | Clean cook stoves                                                              |
| <b>Construction</b>                                     | Water spraying, cleaning after loading and unloading                           |

|                         |                                                                                                                                                                                                                                                                          |
|-------------------------|--------------------------------------------------------------------------------------------------------------------------------------------------------------------------------------------------------------------------------------------------------------------------|
| <b>Open Burning</b>     | Ban on plastic and tyre burning, optimised waste management, incentives for composting, alternative to stubble burning with incentives and technologies                                                                                                                  |
| <b>Resuspended dust</b> | Conversion of unpaved roads to paved roads, wall to wall paving, tree planting<br>Mechanised sweeping and watering of the road                                                                                                                                           |
| <b>Diesel Generator</b> | Continuous power supply                                                                                                                                                                                                                                                  |
| <b>Industry</b>         | Ban of new industry in city limit, shifting of polluting industry, installation of wet scrubber, coal burning converted to natural gas, emission trading, upgrading brick clen technology, tax incentives                                                                |
| <b>Vehicles</b>         | Odd / even vehicle number on road, buses and 3 Wheelers on CNG, Bus rapid transport implementation, retrofitting, ban of old vehicles, increase share of electric vehicles, installation of catalytic converter, traffic management software, designing new cycle tracks |

**\*\* GIS data**

|                   |
|-------------------|
| Canal             |
| City extent       |
| Point of interest |
| Railways          |
| roads             |
| vegetation        |
| ward              |
| Water features    |
| zones             |
| Rivers            |
| industry          |
| Development plan  |

Carslaw, D.C., Ropkins, K., 2012. openair - An R package for air quality data analysis. *Environ. Model. Softw.* 27–28, 52–61. <https://doi.org/10.1016/j.envsoft.2011.09.008>

Ching, J., Mills, G., Bechtel, B., See, L., Feddema, J., Wang, X., Ren, C., Brousse, O., Martilli, A., Neophytou, M., Mouzourides, P., Stewart, I., Hanna, A., Ng, E., Foley, M., Alexander, P., Aliaga, D., Niyogi, D., Shreevastava, A., Bhalachandran, P., Masson, V., Hidalgo, J., Fung, J., Andrade, M., Baklanov, A., Dai, W., Milcinski, G., Demuzere, M., Brunsell, N., Pesaresi, M., Miao, S., Mu, Q., Chen, F., Theeuwes, N., 2018. WUDAPT: An Urban Weather, Climate, and Environmental Modeling Infrastructure for the Anthropocene. *Bull. Amer. Meteor. Soc.* 99, 1907–1924. <https://doi.org/10.1175/BAMS-D-16-0236.1>

Kantakumar, L.N., Kumar, S., Schneider, K., 2016. Spatiotemporal urban expansion in Pune metropolis, India using remote sensing. *Habitat International* 51, 11–22. <https://doi.org/10.1016/j.habitatint.2015.10.007>
